# Supplementary material
Source: PubMed Central journal article supplement (PMC3125975)
Supplement: NIHMS301776-supplement-supplement_1.pdf [file NIHMS301776-supplement-supplement_1.pdf]

## **Supporting Online Material:**

### **Materials and Methods**

#### *Bacterial Strains*

WT strain M (ATCC #BAA-535) and the  $\Delta$ RD1 strain derived from it (*I*) were transformed with plasmids containing transcriptional fusions of genes encoding green-fluorescent protein (GFP) to a constitutive Mm promoter as described (*1-3*). Bacteria were grown in 7H9 media supplemented with oleic acid-albumin-dextrose-complex and 0.05% Tween-80 unless otherwise stated.

#### *Embryo Infection and Husbandry*

All zebrafish experiments were conducted in conformity with the Public Health Service Policy on Humane Care and Use of Laboratory Animals using protocols approved by the Institutional Animal Care and Use Committee of the University of Washington.

Zebrafish embryos of the AB line were injected with Mm or PBS (mock-injected) using phenol red as a visual marker at 30 hours post fertilization (hpf) via caudal vein as described (*4*). Innocula at injection were determined by injecting the same volume onto a hemocytometer and counting bacteria by fluorescence microscopy and/or by injecting the same volume onto selective bacteriologic plates and enumerating bacteria when colonies formed in 5-7 days. Bacterial burdens in embryos were determined by plating lysed embryos or where noted by fluorescence pixel counts (FPC). After images have been taken with standardized exposure times, FPC integrates the number of pixels in each image with values above a background threshold, as determined by matched images of uninfected animals. For the microarray experiments, ~150-200 CFU of WT Mm and 200-

300  $\Delta$ RD1 Mm were injected per embryo. 30-50 embryos were maintained throughout the experiment in 100x15 mM Petri dishes in water with 0.003% PTU to prevent melanization. Each day, any dead embryos were removed and 50% of the water was replaced. At 5 dpi, all embryos were examined by low-power fluorescence microscopy and the outliers of infection (low or extremely high levels of infection) as assessed visually were removed from the final pool. Approximately 40% of each total pool was removed, leaving pools of 30 to 90 embryos for further analysis.

*Whole genome transcriptional profiling – Affymetrix platform*

Total RNA was extracted from groups of zebrafish larvae (31-82 larvae/group, 3 biological replicate groups/condition) using established methods (5). RNA quality was confirmed using an Agilent 2100 Bioanalyzer. Total RNA was used to prepare cRNA targets that were hybridized (30  $\mu$ g/sample) to Affymetrix GeneChip Zebrafish Genome Arrays using established protocols (6). GeneChip data were analyzed using dChip software (build date Dec. 11, 2005) (7). CEL files were normalized (Invariant set method), and model-based expression values were generated (PM-MM model).

Expression values were then exported into MeV software (8) and probesets differentially expressed between any two different conditions (i.e., WT-infected vs. mock-infected at 5 dpi; mock-infected vs. uninjected at 5 dpi) were identified in MeV as those that exhibited (i) a minimal fold-change of 1.5, (ii) a paired *t* test p value of  $\leq 0.05$ , and (iii) an average intensity value of  $\geq 10$  in at least one condition (table S1 and S2). Zebrafish genes represented by Affymetrix probesets were identified using NetAffx (July 14, 2006 release; <http://www.affymetrix.com/analysis/>), the Zebrafish Affy Chip Annotation

Project (<http://134.174.23.160/zfaca/hash/master020106public.aspx>), and through manual annotation using the zebrafish genome assembly at Ensembl ([http://www.ensembl.org/Danio\\_rerio/](http://www.ensembl.org/Danio_rerio/)).

*Whole genome transcriptional profiling – Compugen platform*

Total RNA was extracted from groups of zebrafish larvae (154-180 larvae/group, 2 biological replicate groups/condition) using established methods (5). RNA quality was confirmed using an Agilent 2100 Bioanalyzer. Total RNA was used to prepare cDNA targets that were labeled and hybridized (12 µg/sample) to glass slides printed with the Zebrafish Oligonucleotide Library (oligonucleotides designed by Compugen and synthesized by Sigma-Genosys) using established protocols (5). Slides were scanned and expression values measured and normalized as described using ScanArray software (Perkin Elmer) (5). Each experiment consisted of pairwise competitive hybridizations from two treatment groups (i.e., WT-infected vs. mock-infected at 5 dpi), plus reciprocal dye-swap replicates. Since biological duplicates were generated for each treatment group, a total of four DNA microarrays were utilized per comparison of the two treatment groups. Oligonucleotide elements that (i) received "present" flags in all four microarrays and (ii) displayed a >6 mean signal-to-noise ratio across both dye channels in all four microarray replicates were identified and all others were excluded. The normalized log<sub>2</sub> ratio of median dye intensities for each remaining element were exported into MeV software (8) and probesets differentially expressed between WT-infected and mock-infected larvae were identified as those that exhibited (i) a minimum fold-change of 1.5 and (ii) a paired t-test p-value of ≤ 0.05 (table S1 and S3). Zebrafish genes represented by

Compugen oligonucleotides were identified using the following methods: (i) annotation provided by Compugen, (ii) the Zebrafish Chip Annotation Database (<http://giscompute.gis.a-star.edu.sg/~govind/zebrafish/version2/>), and/or (iii) through manual annotation using the zebrafish genome assembly at Ensembl ([http://www.ensembl.org/Danio\\_rerio/](http://www.ensembl.org/Danio_rerio/)). Mammalian homologs of zebrafish genes identified using either the Affymetrix or Compugen platforms were identified using BioMart (<http://www.biomart.org/>) in addition to the databases described above. Raw and processed data from the Affymetrix and Compugen platforms were submitted to Gene Expression Omnibus under accession numbers GSE8327 and GSE8846 (<http://www.ncbi.nlm.nih.gov/geo/>).

#### *Quantitative RT-PCR*

Total RNA from infected or mock-injected embryos used for DNA microarray analysis were also used as templates for generating cDNA (Superscript II reverse transcriptase; oligo dT primers; Invitrogen) for quantitative real-time RT-PCR analysis. For SYBR Green: qRT-PCR assays were performed such that each 20 $\mu$ L reaction contained either 250 nM of gene-specific primers or B-actin specific control primers (see table S4 for a list of gene-specific primers). SYBR green PCR Master Mix (Applied Biosystems) was used at 1X. TAQMAN: Assays were performed with 900nM of each unlabeled primer and 250nM of 5'FAM-DHQ probes (Applied Biosystems). Taqman Universal Master Mix was used at 1X. All qRT-PCR assays were performed in triplicate with an ABI Prism 7300 Real Time PCR System (Applied Biosystems). Data were normalized to B-actin ( $\Delta\Delta$ CT analysis). qRT-PCR was used to verify changes in gene expression

observed in DNA microarray assays of WT vs. mock,  $\Delta$ RD1 vs. mock, and mock vs. untouched samples at 6dpf/5dpi.

#### *Fluorescence In Situ Hybridization and TUNEL analysis*

RNA transcripts were localized in situ, singly or in combination (multiplex), as described in (9). Briefly, digoxigenin or fluorescein-labeled antisense RNA probes were generated and hybridized to zebrafish embryos that were fixed in 4% paraformaldehyde and permeabilized with proteinase K. Primary sheep anti-hapten antibodies were detected with HRP-conjugated secondary antibodies, and TSA visualization with Molecular Probes Alexa 555 (red) or Alexa 488 (green) was performed. TUNEL labeling was performed as described (9). Granuloma diameter was determined as described (10) and only granulomas between 20 and 50  $\mu$ m were analyzed. Mean granuloma diameter ( $\mu$ m $\pm$ SEM) was 29 $\pm$ 9, 27 $\pm$ 7, and 30 $\pm$ 11 for control infected with WT Mm, control infected with  $\Delta$ RD1 Mm, and *mmp9* morphant (e2) injected with WT Mm, respectively.

#### *Gelatinase Zymography*

Embryos were collected and rinsed once with lysis buffer (150mM NaCl, 10mM HEPES, 2 mM DTT, 0.1% Triton X-100, pH 8.0), then resuspended and ground in lysis buffer supplemented with EDTA-free protease inhibitor (Calbiochem #539137). Gelatinases were purified from lysates using gelatin-sepharose beads (Amersham 17-0956-01). Briefly, gelatin-sepharose beads were washed three times with equilibration buffer (50mM Tris-HCl pH 7.5, 0.5M NaCl, 10mM CaCl<sub>2</sub>, 0.01% Tween 20, 5mM O-phenanthroline) and resuspended in equilibration buffer. An equal volume of beads and

lysate was added to a Micro Biospin Column (Biorad) and allowed to bind overnight at 4°C with gentle rocking. Beads were then washed with buffer 1 (50mM Tris-HCl pH7.5, 0.5M NaCl, 10mM CaCl<sub>2</sub>, 0.05% Tween 20, 5mM O-phenanthroline) and twice with buffer 2 (50mM Tris-HCl pH7.5, 10mM CaCl<sub>2</sub>, 0.05% Tween 20, 5mM O-phenanthroline). Next gelatinases were eluted with elution buffer (100 mM Tris-HCl pH6.8, 4% SDS, 20% Glycerol, 200ug/ml bromophenol blue) and loaded and run on a 10% Zymogram gel (Invitrogen), which was developed per the manufacturer's instructions.

#### *Gelatinase Fluorimetry*

Embryos were homogenized in lysis buffer (as described above) and centrifuged to remove cellular debris. DQ gelatin (Molecular Probes D12054) was added to embryo lysates per the manufacturer's instructions. Samples were read on a microplate reader (Tecan GENiosPro) after two to four hours of incubation at room temperature.

#### *Morpholino injections*

Morpholinos were obtained from Genetools. Control, *pu.1*, *myd88*, and *tr1* morpholinos were injected as previously described (10-12). *mmp9* morpholinos were directed to the exon 2-3 boundary (5'-GAATAATGTCCCACCTGTATGTGAC-3'), the exon 6-7 boundary (5'-GTAAGTTTACCTCTGTTAGGGCAGA-3'), and the translations start (5'-CGCCAGGACTCCAAGTCTCATTTTG-3') and used at 0.5 mM, 0.5 mM, and 0.1mM respectively. 5nL of this mixture was injected per embryo into the yolk at the one- to four-cell stage. Each of the *mmp9* morpholinos diminished gelatinase activity when used

singly or in combination, and gave similar infection phenotypes, consistent with specific knock down of Mmp9 activity.

#### *Bacterial Supernatant Injections*

Bacterial supernatants were prepared from either WT or  $\Delta$ RD1 grown in an albumin-free minimal medium (Sauton's) supplemented with 0.05% Tween 80 to mid log phase, filtered through a 0.2  $\mu$ m filter (Millipore), and then concentrated  $\sim$  16-fold by centrifugation in an Amicon Ultra-15 Ultracel-3K (Millipore #UFC900324). Protein concentrations were assessed using Coomassie Plus (Pierce #232236). Similar amounts of either WT or  $\Delta$ RD1 supernatant (approximately 10 nL of supernatant containing  $22 \times 10^{-15}$  g of total protein) were injected at two days post fertilization. RNA was harvested at four hours post injection.

#### *ESAT-6 and CFP-10 injections*

Endotoxin free *M. tuberculosis* rESAT-6-His<sub>(6)</sub> and rESAT-6-His<sub>(6)</sub> proteins were obtained from Colorado State University under the NIH TB Research Materials Contract, and solubilized in 10mM ammonium bicarbonate.  $\sim$  10 nL of a 500  $\mu$ g/ ml solution of protein was injected into embryos at two days post fertilization.

#### *Microscopy*

Widefield microscopy was performed on a Nikon E600 equipped with DIC optics, a Nikon D-FL-E fluorescence unit with 100W Mercury lamp and MFC-1000 z-step controller (Applied Scientific Instrumentation). Objectives used included 10x Plan Fluor,

0.3 NA and 60x Oil Plan Apo, 1.4 NA. Widefield fluorescence and DIC images were captured on a CoolSnap HQ or CoolSnap CF CCD camera (Photometrics) using MetaMorph 7.1 (Molecular Devices). Confocal microscopy was performed on an Olympus Fluoview FV1000 laser scanning confocal microscope equipped with lasers capable of 405nm, 637nm, 488nm, and 561nm excitation. Objectives used were 10x UplanApo air, 0.4 NA and 20x UplanApo air, 0.75 NA.

### *Image Processing*

Where indicated, z-stacks were deconvolved using AutoDeblur Gold CWF, Version X1.4.1 (Media Cybernetics), with default settings for blind deconvolution. Additional dataset analysis and visualization was performed using Imaris x64 6.0 (Bitplane) and MetaMorph 7.1 (Molecular Devices). Movies were produced either directly from Imaris or from stacks compiled in MetaMorph with some graphics added using ImageJ.

Volumetric rendering of bacteria discerned by DIC microscopy (Fig. 3C; movies S2 and S3) were performed as follows. Stacks of DIC images taken concurrently with fluorescence stacks were scanned manually for the location of bacteria. By tracing these locations a new stack was constructed with locations of bacteria represented as maximum intensity. This stack was combined with the fluorescence channels in Imaris to render the locations of bacteria in three dimensions.

### *Statistical Analysis*

Statistical analysis was performed with Prism (Graphpad Software) for all comparisons.



## Supplemental Figures and Movie Legends

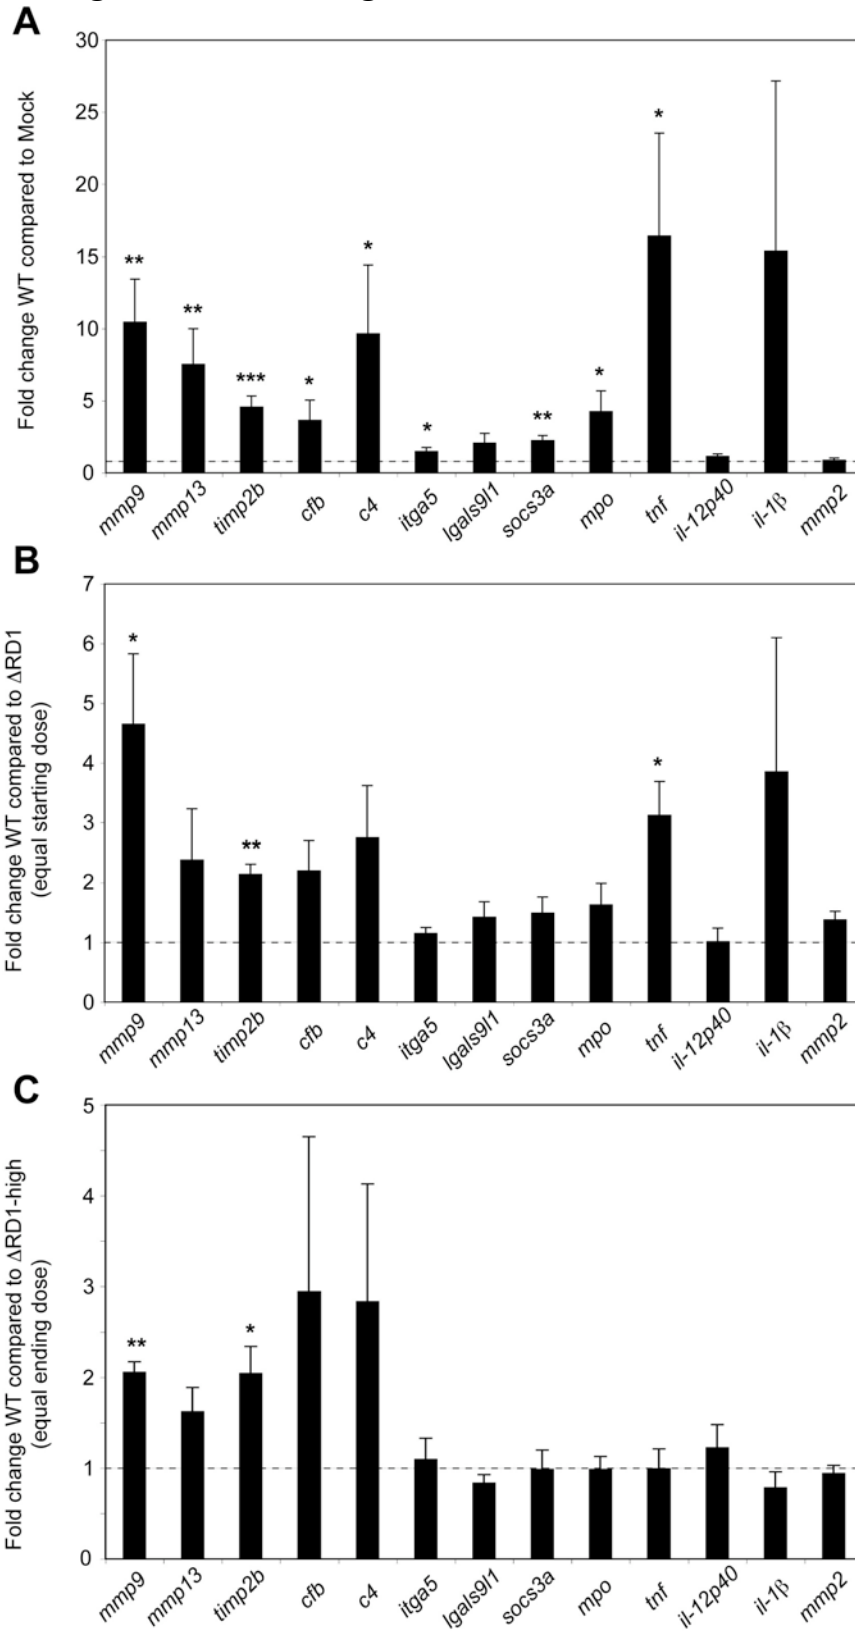

**fig. S1.** Immune response genes regulated by infection. **(A)** Relative gene expression levels by qRT-PCR of WT- and mock-infected embryos at 5 dpi. Experiments were performed on at least 5 biological replicates for each gene. The induction of each gene was normalized to  $\beta$ -actin. Bars represent means of fold changes over mock  $\pm$  SEM. Infecting dose  $183 \pm 37$ . **(B)** Relative gene expression levels at 5 dpi of WT- and  $\Delta$ RD1-infected embryos. Bars represent fold changes of WT-infected over  $\Delta$ RD1-infected  $\pm$  SEM. Similar doses of bacteria were injected (WT dose  $193 \pm 36$  and  $\Delta$ RD1 dose  $217 \pm 63$ ) for each experiment, and data represent at least 3 biological replicates for each gene. **(C)** Relative gene expression levels of 5 dpi WT- and  $\Delta$ RD1-high-infected embryos. Bars represent fold changes of WT-infected over  $\Delta$ RD1-high-infected  $\pm$  SEM.  $\Delta$ RD1 starting bacterial doses were adjusted to achieve equal ending counts at 5 dpi as WT (WT ending count  $1601 \pm 1071$  and  $\Delta$ RD-high ending count  $1531 \pm 1011$ ). Induction of *tumor necrosis factor (tnf)* and *interleukin 1b (il1b)* was RD1-independent, consistent with mouse studies (13, 14). Data represent 3 biological replicates for each gene. \*  $p < 0.05$ , \*\*  $p < 0.01$ , \*\*\* $p < 0.005$  (Student's t-test).

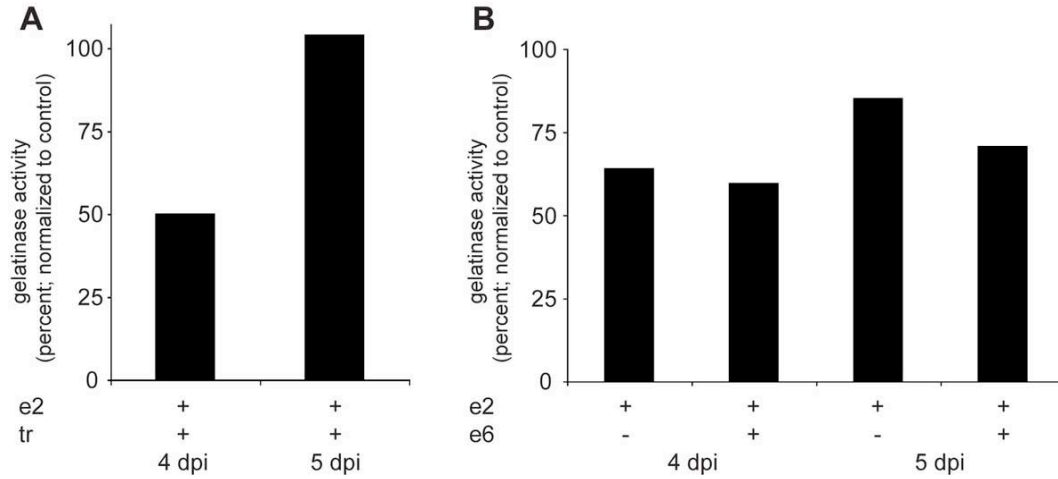

**fig. S2.** *mmp9* morpholinos decrease Mmp9 activity during infection. Embryos injected with *mmp9* gene specific or control morpholinos at the 2-4 cell stage were infected with WT at 30 hpf. Total gelatinase activity in whole embryos was assayed at 4 and 5 dpi. **(A)** A combination of the translation blocking (tr) morpholino, and the splice blocking morpholino directed against the second exon/intron boundary (e2) was injected prior to infection with  $107 \pm 38$  WT. **(B)** e2 was injected singly or in combination with another splice blocking morpholino e6, directed against the sixth exon/intron boundary prior to infection with  $64 \pm 17$  WT. Gelatinase activity was normalized to control morpholino injected WT-infected embryos.

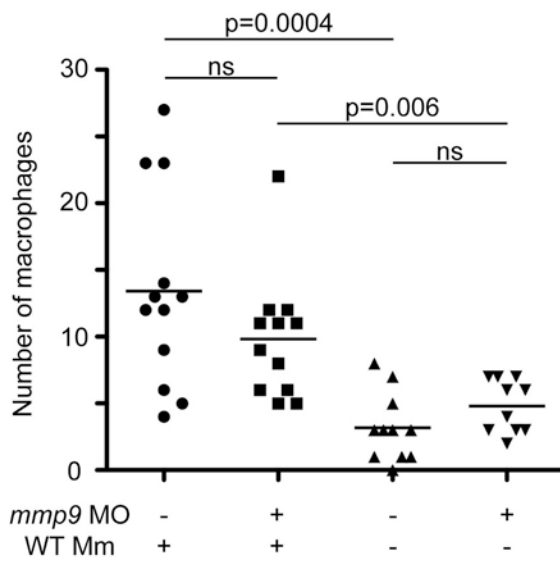

**fig. S3.** Mmp9 is not required for initial macrophage recruitment to bacteria. Macrophage recruitment to hindbrain ventricle assessed 4 hours after injection of WT into this cavity at 32 hpf. Control (con), and *mmp9* morphants (tr in combination with e2) (MO) showed no difference in macrophage recruitment to Mm. Bars represent means.

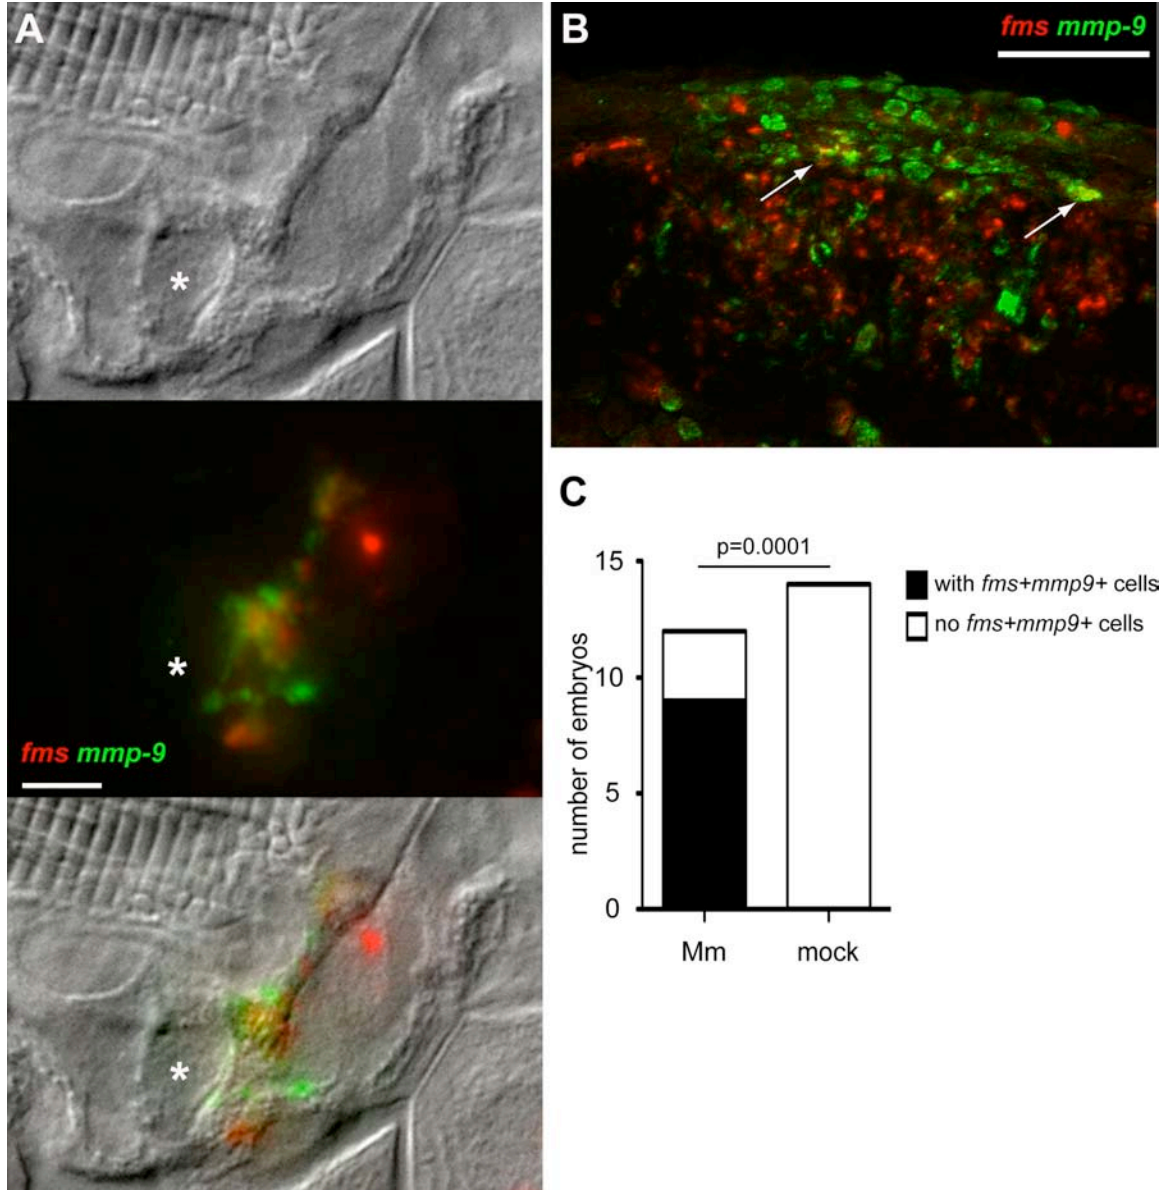

**fig. S4.** Infection-dependent *mmp9* induction in macrophages. *mmp9*-expressing macrophages in 5 dpi WT-and mock infected embryos were identified by dual FISH for *fms* and *mmp9* co-expression. (**A** and **B**) The majority of WT-infected embryos had some *mmp9*-expressing single macrophages. (**A**) DIC, deconvolved fluorescence, and overlay images of a single macrophage expressing *mmp9*. \*, nucleus of the macrophage. Scale bar, 5 $\mu$ m; (**B**) Some granuloma macrophages also expressed both markers (arrows). Scale bar, 50 $\mu$ m. (**C**) Number of embryos with any *mmp9*-positive macrophages (*fms+mmp9+* cells) in infected and uninfected embryos.  $p=0.0001$  (Fisher's exact test of a contingency table).

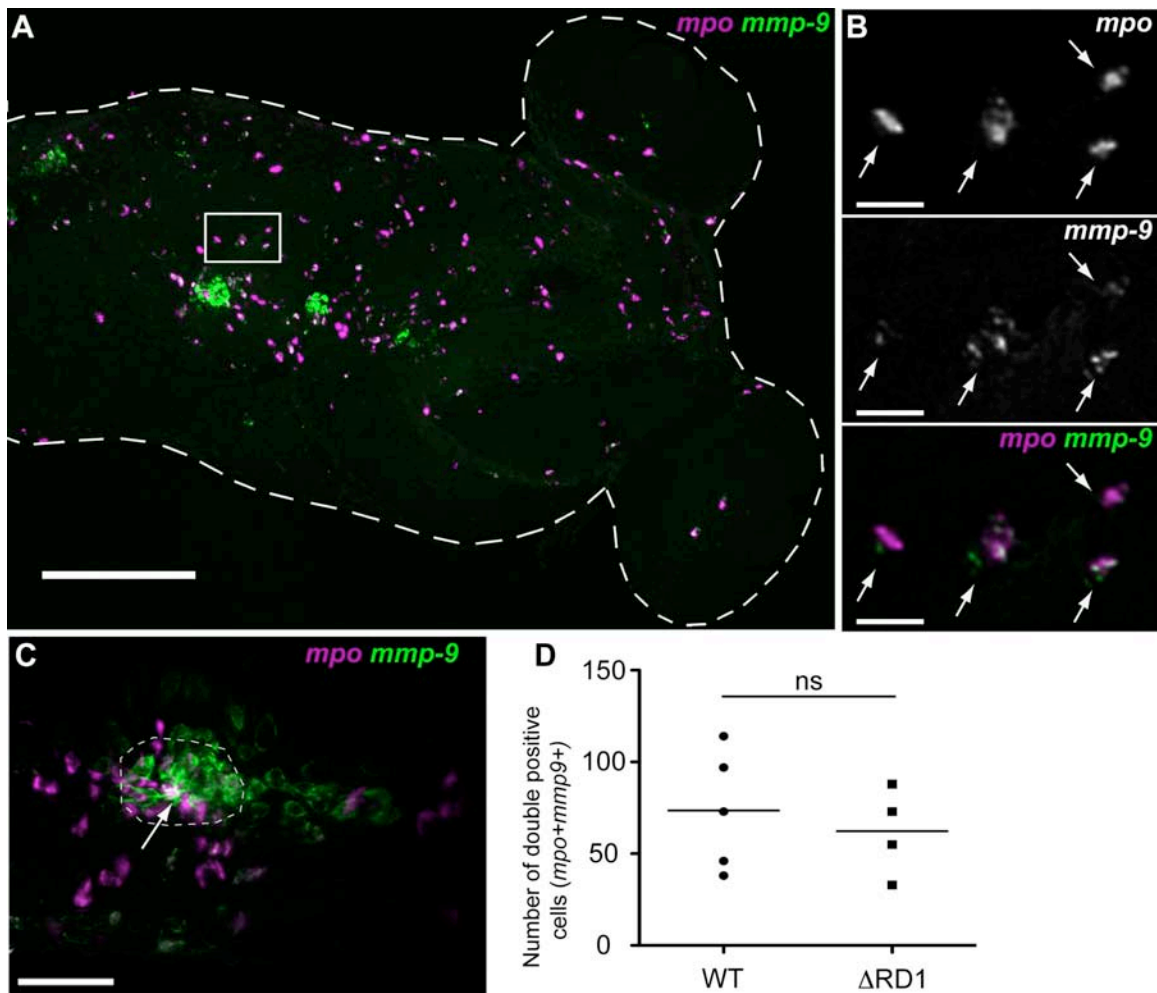

**fig. S5.** Infection-dependent and RD1-independent induction of *mmp9* in neutrophils. **(A)** Image of the head region of 5 dpi-embryos after FISH with probes directed against *mmp9* (green) and the neutrophil-specific marker *mpo* (magenta). White dotted line demarcates embryo outline. Deconvolved confocal image. Scale bar, 200 $\mu$ m. **(B)** Higher magnification of boxed inset in (A) showing cells expressing both *mpo* and *mmp9* (arrows). Scale bar, 20 $\mu$ m. **(C)** Area of a granuloma (demarcated by dotted white outline) showing lack of co-localization of *mmp9* and *mpo*. Arrow points to the only cell expressing both markers. Also deconvolved. Scale bar, 50 $\mu$ m. **(D)** Enumeration of *mpo* and *mmp9* double-positive cells (*mpo*<sup>+</sup>*mmp9*<sup>+</sup>) in the head region of WT- and  $\Delta$ RD1-infected embryos at 5dpi. Bars represent means. ns, not significant (Student's t-test).

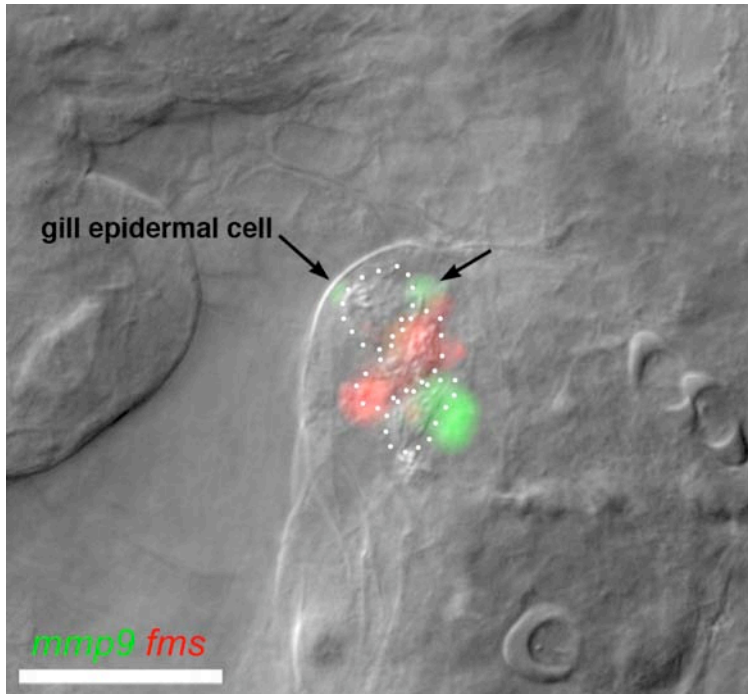

**Fig. S6.** Epithelial cell *mmp9* expression is associated with the earliest discernible macrophage aggregates. Fluorescence and DIC overlay image following FISH with *mmp9* (green) and *fms* (red) probes of nascent granuloma in gill at 5 dpi WT-infected embryo. Dotted white lines represent infected macrophages in which bacteria can be discerned by DIC imaging. Arrows point to proximate gill epidermal cells that have begun to express *mmp9*. Widefield fluorescence data deconvolved. Scale bar, 20 $\mu$ m. Also see movie S3.

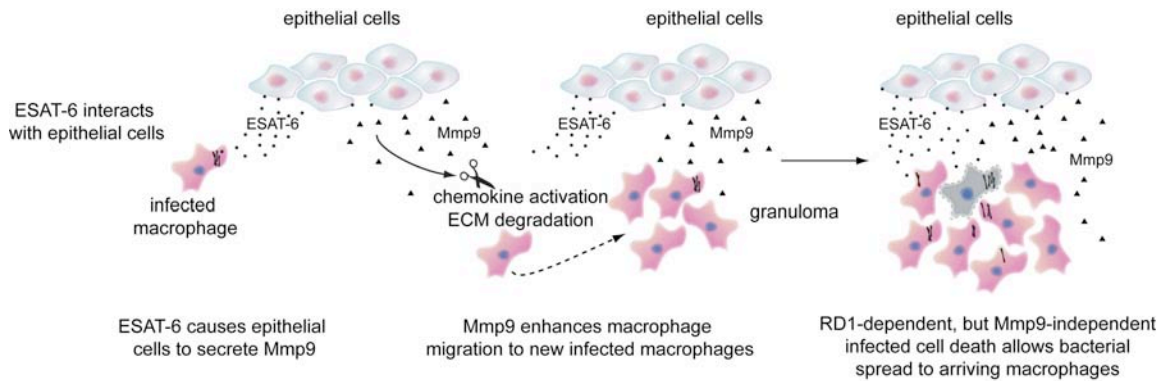

**fig. S7** Model of steps of Mmp9-mediated granuloma formation depicting release of ESAT-6 (a virulence protein secreted from the RD1 locus) from infected macrophages, induction of Mmp9 in neighboring epithelial cells, which causes activation of chemokine gradients and/or extracellular matrix (ECM) degradation, resulting in migration of uninfected macrophages to the infected macrophage and their continued movement within the forming granuloma (15). ESAT-6 may be released from infected cells via its pore-forming activity (16, 17). RD1 is also required for infected cell death (1, 15, 18) that produces a second signal directing nearby macrophages to phagocytose dying infected macrophages (15), resulting in bacterial spread within the granuloma. This work shows that RD1-dependent cell death proceeds through an Mmp9-independent pathway. However, RD1-induced cell death may enhance ESAT-6 release allowing its interaction with epithelial cells.

**Movie S1 3-D reconstruction of *mmp9* expression by epidermal cells adjacent to a WT Mm granuloma**

Focus-through stack of multiplex fluorescence in situ hybridization (FISH) of *mmp9* (green) and *fms* (red) localization with corresponding DIC images of a WT Mm granuloma in an embryo at 5 days post infection. Non-expressing periderm cells (white outlines) overlay *mmp9*-expressing epidermal cells (black outlines). This movie is an enlargement of the same granuloma shown in Figure 3B. Relative location in the z-plane is represented by the graph in the lower left panel. Upper left, fluorescence; Upper right, DIC with cell outlines; lower left, overlay. Widefield fluorescence data deconvolved. Scale bar, 10 $\mu$ m.

**Movie S2 3-D reconstruction of WT Mm granuloma in muscle shows *mmp9* expressed only by distant overlying epidermal cells.**

Focus through and 3-D reconstruction of multiplex FISH of *mmp9* (green) and *fms* (red) localization with corresponding DIC images of a WT Mm granuloma in an embryo at 5 days post infection. This movie is an enlargement of the same granuloma shown in Figure 3C. Bacterial locations have been inferred from DIC images and pseudo-colored in blue (see Supplemental Materials and Methods). Widefield fluorescence data deconvolved. Grid lines represent 10 $\mu$ m.



**Movie S3 3-D reconstruction of a nascent WT Mm granuloma shows *fms* negative cells already expressing *mmp9*.**

Focus through and 3-D reconstruction of multiplex FISH of *mmp9* (green) and *fms* (red) localization with DIC images of a WT Mm granuloma in an embryo at 5 days post infection. This movie is an enlargement of the same granuloma shown in Figure S6. Bacterial locations have been inferred from DIC images and pseudo-colored in blue (see Supplemental Materials and Methods). Widefield fluorescence data deconvolved. Grid lines represent 10 $\mu$ m.

## References

1. H. E. Volkman *et al.*, *PLoS Biol* **2**, e367 (2004).
2. K. Chan *et al.*, *Proc Natl Acad Sci U S A* **99**, 3920 (2002).
3. C. L. Cosma, O. Humbert, L. Ramakrishnan, *Nat Immunol* **5**, 828 (2004).
4. J. M. Davis *et al.*, *Immunity* **17**, 693 (Dec, 2002).
5. J. F. Rawls, B. S. Samuel, J. I. Gordon, *Proc Natl Acad Sci U S A* **101**, 4596 (2004).
6. L. V. Hooper *et al.*, *Science* **291**, 881 (2001).
7. C. Li, W. Hung Wong, *Genome Biol* **2**, RESEARCH0032 (2001).
8. A. I. Saeed *et al.*, *Biotechniques* **34**, 374 (2003).
9. H. Clay, Ramakrishnan, L. , *Zebrafish* **2**, 105 (2005).
10. H. Clay, H. E. Volkman, L. Ramakrishnan, *Immunity* **29**, 283 (2008).
11. H. Clay *et al.*, *Cell Host & Microbe* **2**, 29 (July, 2007).
12. J. M. Bates, J. Akerlund, E. Mittge, K. Guillemin, *Cell Host Microbe* **2**, 371 (2007).
13. I. C. Koo *et al.*, *Cell Microbiol* **10**, 1866 (2008).
14. S. A. Stanley, S. Raghavan, W. W. Hwang, J. S. Cox, *Proc Natl Acad Sci U S A* **100**, 13001 (2003).
15. J. M. Davis, L. Ramakrishnan, *Cell* **136**, 37 (2009).
16. M. I. de Jonge *et al.*, *J Bacteriol* **189**, 6028 (2007).
17. T. Hsu *et al.*, *Proc Natl Acad Sci U S A* **100**, 12420 (2003).
18. K. M. Guinn *et al.*, *Mol Microbiol* **51**, 359 (2004).

**Table S1: Immune genes that are differentially expressed in Mm-infected compared to mock-infected zebrafish**

| Gene name                                           | Ensembl Gene ID    | Affymetrix       |     | Compugen            |      | qRT-PCR validation | Gene Induction and/or Functional Role in Mammalian TB |
|-----------------------------------------------------|--------------------|------------------|-----|---------------------|------|--------------------|-------------------------------------------------------|
|                                                     |                    | Probe ID         | FC  | Probe ID            | FC   |                    |                                                       |
| <b>ECM and MMP</b>                                  |                    |                  |     |                     |      |                    |                                                       |
| matrix metalloproteinase 9 (mmp9) *                 | ENSDARG00000042816 | Dr.967.1.S1_at   | 4.9 | --                  | --   | +                  | (1-5)                                                 |
| matrix metalloproteinase 13 (mmp13) *               | ENSDARG00000012395 | --               | --  | CGENXEB_456014688_0 | 2.81 | +                  | (1, 5-8)                                              |
| tissue inhibitor of metalloproteinase 2b (timp2b) * | ENSDARG00000075261 | Dr.15281.1.A1_at | 2.7 | --                  | --   | +                  | (4, 9)                                                |
| <b>Innate immune cell markers</b>                   |                    |                  |     |                     |      |                    |                                                       |
| coronin, actin binding protein, 1A (coro1a) *       | ENSDARG00000054610 | --               | --  | CGENXEB_456001924_0 | 2.3  | ND                 | (10-12)                                               |
| myeloid-specific peroxidase (mpx/mpo) *             | ENSDARG00000019521 | --               | --  | CGENXEB_456000173_0 | 2.03 | +                  | (13-15)                                               |
| <b>Complement</b>                                   |                    |                  |     |                     |      |                    |                                                       |
| complement C4 (c4) *                                | ENSDARG00000038424 | Dr.12491.1.A1_at | 4.3 | CGENXEB_456008645_0 | 2.66 | +                  | (5, 8, 16-21)                                         |
| complement factor B (cfb) *                         | ENSDARG00000055278 | Dr.190.1.S1_at   | 3.8 | CGENXEB_456000406_0 | 2.33 | +                  |                                                       |
| complement component 3a (c3a) *                     | ENSDARG00000012694 | --               | --  | CGENXEB_456004596_0 | 2.36 | ND                 |                                                       |
| complement component 3c (c3c) *                     | ENSDARG00000052207 | --               | --  | CGENXEB_456000237_0 | 2.33 | ND                 |                                                       |
| complement component 3c (c3c) *                     | ENSDARG00000052207 | --               | --  | CGENXEB_456015311_0 | 2.27 | ND                 |                                                       |
| <b>Adhesion</b>                                     |                    |                  |     |                     |      |                    |                                                       |
| integrin alpha 5 (itga5) *                          | ENSDARG00000006353 | Dr.22498.1.A1_at | 2.7 | --                  | --   | +                  | (5, 22)                                               |
| galectin 9, like 1 (lgals9l1) *                     | ENSDARG00000025903 | Dr.25862.1.A1_at | 2.2 | --                  | --   | NS                 | (5, 23, 24)                                           |
| galectin 1, like 2 (lgals1l2) *                     | ENSDARG00000054942 | Dr.13015.1.S1_at | 2.1 | --                  | --   | ND                 |                                                       |
| CD82 antigen (cd82)                                 | ENSDARG00000026070 | Dr.10301.1.A1_at | 2   | --                  | --   | ND                 |                                                       |
| <b>Cytokines</b>                                    |                    |                  |     |                     |      |                    |                                                       |
| suppressor of cytokine signaling 3a (socs3a) *      | ENSDARG00000025428 | Dr.6431.1.S1_at  | 2.4 | --                  | --   | +                  | (25)                                                  |
| <b>Coagulation/Acute Phase</b>                      |                    |                  |     |                     |      |                    |                                                       |
| coagulation factor V (f5) *                         | ENSDARG00000055705 | Dr.18429.1.A1_at | 2.6 | --                  | --   | ND                 | (26, 27)                                              |
| serum amyloid A (saa) *                             | ENSDARG00000045999 | --               | --  | CGENXEB_456005085_0 | 2.68 | ND                 | (5, 8, 21, 28)                                        |
| novel pentraxin-related gene                        | ENSDARG00000056462 | --               | --  | CGENXEB_456015990_0 | 2.48 | ND                 |                                                       |

\* genes upregulated on Affymetrix or Compugen arrays during late stage tuberculosis of adult zebrafish (29)

**Table S2: Differentially expressed genes identified using the Affymetrix platform**

| Probe ID          | Gene annotation                                                                     | Gene symbol  | Ensembl ID         | WT/Mock comparison <sup>a</sup> |         |             | WT/Un comparison <sup>b</sup> |         |             | Mock/Un comparison <sup>c</sup> |         |             |
|-------------------|-------------------------------------------------------------------------------------|--------------|--------------------|---------------------------------|---------|-------------|-------------------------------|---------|-------------|---------------------------------|---------|-------------|
|                   |                                                                                     |              |                    | Fold-change                     | P-value | Significant | Fold-change                   | P-value | Significant | Fold-change                     | P-value | Significant |
| Dr.8591.1.A1_at   | similar to hemopexin                                                                | zgc:152945   | ENSDARG00000051912 | <b>7.14</b>                     | 0.0185  | *           | 4.83                          | 0.0164  | *           | 0.68                            | 0.1542  |             |
| DrAffx.2.1.S1_at  | collagen 1 alpha 1                                                                  | col1a1       | ENSDARG00000012405 | <b>5.16</b>                     | 0.0261  | *           | 2.11                          | 0.0285  | *           | 0.41                            | 0.0274  |             |
| Dr.967.1.S1_at    | matrix metalloproteinase 9                                                          | mmp9         | ENSDARG00000042816 | <b>4.88</b>                     | 0.0245  | *           | 10.68                         | 0.0384  | *           | 2.19                            | 0.3314  |             |
| Dr.12491.1.A1_at  | complement C4                                                                       | c4           | ENSDARG00000038424 | <b>4.26</b>                     | 0.0313  | *           | 5.56                          | 0.0304  | *           | 1.31                            | 0.298   |             |
| Dr.3073.1.A1_at   | serpin peptidase inhibitor, clade A (alpha-1 antiproteinase, antitrypsin), member 7 | serpina7     | ENSDARG00000035492 | <b>3.92</b>                     | 0.0405  | *           | 2.76                          | 0.1046  |             | 0.70                            | 0.5082  |             |
| Dr.190.1.S1_at    | complement component factor B                                                       | cfb          | ENSDARG00000055278 | <b>3.83</b>                     | 0.0254  | *           | 4.43                          | 0.0229  | *           | 1.16                            | 0.3335  |             |
| Dr.22401.1.A1_at  | DBH-like monooxygenase protein 1 homolog                                            | moxd1        | ENSDARG00000031136 | <b>3.57</b>                     | 0.0144  | *           | 2.83                          | 0.0015  | *           | 0.79                            | 0.3898  |             |
| Dr.22923.1.A1_at  | similar to synaptophysin-like protein 2 (SYPL2)                                     | zgc:110355   | ENSDARG00000000690 | <b>3.32</b>                     | 0.0225  | *           | 1.48                          | 0.2297  |             | 0.45                            | 0.0481  |             |
| Dr.6347.1.A1_at   | de-etiolated homolog 1 (Arabidopsis)                                                | det1         | ENSDARG00000006145 | <b>3.08</b>                     | 0.0426  | *           | 1.05                          | 0.8686  |             | 0.34                            | 0.0344  |             |
| Dr.17591.1.S1_at  | similar to complement component 1, q subcomponent-like 4                            | LOC100149559 | ---                | <b>2.97</b>                     | 0.0366  | *           | 3.82                          | 0.018   | *           | 1.28                            | 0.2229  |             |
| Dr.22498.1.A1_at  | integrin, alpha 5 (fibronectin receptor, alpha polypeptide)                         | itga5        | ENSDARG00000006353 | <b>2.73</b>                     | 0.0257  | *           | 1.38                          | 0.2097  |             | 0.51                            | 0.1798  |             |
| Dr.15281.1.A1_at  | tissue inhibitor of metalloproteinase 2b                                            | timp2b       | ENSDARG00000075261 | <b>2.73</b>                     | 0.0452  | *           | 2.89                          | 0.0195  | *           | 1.06                            | 0.8471  |             |
| Dr.18429.1.A1_at  | coagulation factor V                                                                | f5           | ENSDARG00000055705 | <b>2.60</b>                     | 0.0235  | *           | 2.94                          | 0.0028  | *           | 1.13                            | 0.672   |             |
| Dr.17437.1.S1_at  | similar to C1q-like protein                                                         | zgc:136272   | ENSDARG00000023157 | <b>2.54</b>                     | 0.037   | *           | 2.25                          | 0.1793  |             | 0.89                            | 0.7754  |             |
| Dr.14949.1.A1_at  | similar to T28C6.9                                                                  | LOC798149    | ---                | <b>2.49</b>                     | 0.0049  | *           | 2.34                          | 0.0805  |             | 0.94                            | 0.8601  |             |
| Dr.17438.1.S1_at  | similar to TRAF2 binding protein (TIFA)                                             | LOC560548    | ENSDARG00000022134 | <b>2.46</b>                     | 0.0033  | *           | 3.11                          | 0.0144  | *           | 1.26                            | 0.2223  |             |
| Dr.6431.1.S1_at   | suppressor of cytokine signaling 3a                                                 | socs3a       | ENSDARG00000025428 | <b>2.36</b>                     | 0.0224  | *           | 2.74                          | 0.0156  | *           | 1.16                            | 0.5108  |             |
| Dr.18445.1.S1_at  | coiled-coil domain containing 58                                                    | ccdc58       | ENSDARG00000045351 | <b>2.35</b>                     | 0.027   | *           | 1.20                          | 0.3654  |             | 0.51                            | 0.2194  |             |
| Dr.14272.1.A1_at  | similar to tripartite motif-containing protein 16 (TRIM16)                          | zgc:153258   | ENSDARG00000076839 | <b>2.34</b>                     | 0.0246  | *           | 1.25                          | 0.3869  |             | 0.54                            | 0.0617  |             |
| Dr.1077.1.S1_at   | similar to cystatin/stefin                                                          | zgc:153129   | ENSDARG00000045980 | <b>2.26</b>                     | 0.0081  | *           | 1.51                          | 0.28    |             | 0.67                            | 0.3581  |             |
| Dr.422.1.A1_at    | unknown                                                                             | wu:fb74b10   | ---                | <b>2.26</b>                     | 0.0494  | *           | 1.40                          | 0.2041  |             | 0.62                            | 0.0345  |             |
| Dr.25862.1.A1_at  | lectin, galactoside-binding, soluble, 9 (galectin 9)-like 1                         | lgals9l1     | ENSDARG00000025903 | <b>2.24</b>                     | 0.0341  | *           | 2.05                          | 0.0353  | *           | 0.92                            | 0.0208  |             |
| Dr.5656.1.A1_at   | thioredoxin-related transmembrane protein 2                                         | tmx2         | ENSDARG00000007786 | <b>2.20</b>                     | 0.0123  | *           | 2.07                          | 0.0179  | *           | 0.94                            | 0.1358  |             |
| Dr.25858.1.A1_at  | unknown                                                                             | wu:fc11a05   | ---                | <b>2.15</b>                     | 0.0317  | *           | 1.27                          | 0.2193  |             | 0.59                            | 0.0561  |             |
| Dr.25719.1.A1_at  | similar to serologically defined colon cancer antigen 8 (SDCCAG8)                   | B8JK76_DANRE | ENSDARG00000078947 | <b>2.14</b>                     | 0.0214  | *           | 1.20                          | 0.5371  |             | 0.56                            | 0.2236  |             |
| Dr.20067.2.A1_at  | calreticulin like                                                                   | calrl        | ENSDARG00000020103 | <b>2.14</b>                     | 0.0444  | *           | 2.00                          | 0.0489  | *           | 0.94                            | 0.1784  |             |
| Dr.18825.1.S1_at  | chemokine CXL-C24a                                                                  | LOC796252    | ENSDARG00000074870 | <b>2.14</b>                     | 0.0258  | *           | 2.53                          | 0.003   | *           | 1.18                            | 0.4116  |             |
| Dr.5816.1.A1_at   | inhibitor of growth family, member 2                                                | ing2         | ENSDARG00000013042 | <b>2.12</b>                     | 0.0382  | *           | 1.27                          | 0.2354  |             | 0.60                            | 0.0834  |             |
| Dr.1259.1.A1_at   | similar to peptidyl-glycine alpha-amidating monooxygenase (PAM) precursor           | LOC100148119 | ENSDARG00000042071 | <b>2.11</b>                     | 0.0407  | *           | 2.20                          | 0.042   | *           | 1.04                            | 0.6499  |             |
| Dr.4306.1.A1_at   | similar to caseinolytic protease X                                                  | zgc:92303    | ENSDARG00000029063 | <b>2.11</b>                     | 0.0485  | *           | 2.03                          | 0.0513  |             | 0.96                            | 0.8099  |             |
| Dr.18470.1.A1_at  | poliovirus receptor-related protein 3 precursor (nectin-3)                          | zgc:113035   | ENSDARG00000006604 | <b>2.08</b>                     | 0.039   | *           | 1.37                          | 0.0117  |             | 0.66                            | 0.2039  |             |
| Dr.13015.1.S1_at  | lectin, galactoside-binding, soluble, 1 (galectin 1)-like 2                         | lgals1l2     | ENSDARG00000054942 | <b>2.06</b>                     | 0.003   | *           | 1.93                          | 0.0342  |             | 0.94                            | 0.6881  |             |
| Dr.10301.1.A1_at  | CD82 antigen                                                                        | cd82         | ENSDARG00000026070 | <b>2.03</b>                     | 0.0431  | *           | 1.73                          | 0.0697  |             | 0.85                            | 0.0359  |             |
| Dr.1368.4.A1_at   | unknown                                                                             | ---          | ---                | <b>2.02</b>                     | 0.0345  | *           | 1.96                          | 0.0672  |             | 0.97                            | 0.7213  |             |
| Dr.6259.1.S1_at   | nucleobindin 2b                                                                     | nucb2b       | ENSDARG00000036291 | <b>2.02</b>                     | 0.0447  | *           | 1.50                          | 0.0583  |             | 0.74                            | 0.2123  |             |
| Dr.10242.1.S1_at  | protein inhibitor of activated STAT, 4 -like                                        | pias4l       | ENSDARG00000042215 | <b>0.49</b>                     | 0.0425  | *           | 0.64                          | 0.0234  |             | 1.31                            | 0.1098  |             |
| Dr.7530.1.A1_at   | similar to SAC3 domain-containing protein 1 (SAC3D1)                                | wu:fd60e07   | ENSDARG00000071271 | <b>0.48</b>                     | 0.0133  | *           | 0.55                          | 0.0673  |             | 1.13                            | 0.4209  |             |
| Dr.23670.1.A1_at  | unknown                                                                             | ---          | ---                | <b>0.48</b>                     | 0.0144  | *           | 0.52                          | 0.1113  |             | 1.08                            | 0.7694  |             |
| Dr.21021.1.S1_at  | dopamine beta hydroxylase                                                           | dbh          | ENSDARG00000069446 | <b>0.48</b>                     | 0.0465  | *           | 0.64                          | 0.2552  |             | 1.35                            | 0.1979  |             |
| Dr.4485.3.A1_x_at | unknown                                                                             | ---          | ---                | <b>0.45</b>                     | 0.0428  | *           | 0.49                          | 0.1528  |             | 1.10                            | 0.4937  |             |
| Dr.437.1.A1_x_at  | unknown                                                                             | wu:fb97g08   | ---                | <b>0.42</b>                     | 0.0336  | *           | 0.60                          | 0.158   |             | 1.42                            | 0.2786  |             |

<sup>a</sup> Comparison of 5dpi zebrafish infected with wild-type Mm versus mock infected zebrafish.

<sup>b</sup> Comparison of 5dpi zebrafish infected with wild-type Mm versus uninfected zebrafish.

<sup>c</sup> Comparison of 5dpi mock-infected zebrafish versus uninfected zebrafish.

**Table S3: Differentially expressed genes identified using the Compugen platform**

| Probe ID            | GenBank ID <sup>a</sup> | Gene annotation                    | Gene symbol       | Ensembl ID         | WT/Mock comparison <sup>b</sup> |         |
|---------------------|-------------------------|------------------------------------|-------------------|--------------------|---------------------------------|---------|
|                     |                         |                                    |                   |                    | Fold-change                     | P-value |
| CGENXEB_456014688_0 | AW420822                | matrix metalloproteinase 13        | mmp13             | ENSDARG00000012395 | <b>2.81</b>                     | 0.03305 |
| CGENXEB_456005475_0 | BE557057                | similar to cornifelin              | --                | ---                | <b>2.76</b>                     | 0.00526 |
| CGENXEB_456005085_0 | BI883516                | serum amyloid A                    | saa               | ENSDARG00000045999 | <b>2.68</b>                     | 0.03946 |
| CGENXEB_456008645_0 | BI672168                | complement C4                      | c4                | ENSDARG00000038424 | <b>2.66</b>                     | 0.02899 |
| CGENXEB_456008142_0 | AI943154                | proteasome 26S subunit, ATPase, 6  | psmc6             | ENSDARG00000037038 | <b>2.54</b>                     | 0.03437 |
| CGENXEB_456001154_0 | AL591172                | unknown                            | si:busm1-48c11.5  | ---                | <b>2.51</b>                     | 0.01677 |
| CGENXEB_456015990_0 | BM103840                | novel pentraxin-related gene       | si:ch211-234p6.13 | ENSDARG00000056462 | <b>2.48</b>                     | 0.00003 |
| CGENXEB_456004596_0 | AW116558                | complement component 3a            | c3a               | ENSDARG00000012694 | <b>2.36</b>                     | 0.00650 |
| CGENXEB_456000237_0 | AF047415                | complement component 3c            | c3c               | ENSDARG00000052207 | <b>2.33</b>                     | 0.00032 |
| CGENXEB_456000406_0 | U34662                  | complement component factor B      | cfb               | ENSDARG00000055278 | <b>2.33</b>                     | 0.00041 |
| CGENXEB_456001924_0 | BM095940                | coronin, actin binding protein, 1A | coro1a            | ENSDARG00000054610 | <b>2.30</b>                     | 0.00554 |
| CGENXEB_456015311_0 | AI722510                | complement component 3c            | c3c               | ENSDARG00000052207 | <b>2.27</b>                     | 0.00278 |
| CGENXEB_456013868_0 | AW076614                | unknown                            | --                | ---                | <b>2.09</b>                     | 0.00801 |
| CGENXEB_456004722_0 | AW117001                | scinderin like b                   | scinlb            | ENSDARG00000058348 | <b>2.09</b>                     | 0.02431 |
| CGENXEB_456013886_0 | AW232713                | unknown                            | wu:fj24h11        | ---                | <b>2.05</b>                     | 0.00603 |
| CGENXEB_456000173_0 | AF349034                | myeloid-specific peroxidase        | mpx               | ENSDARG00000019521 | <b>2.03</b>                     | 0.00038 |
| CGENXEB_456000113_0 | U31079                  | heat shock protein 47              | hsp47             | ENSDARG00000019949 | <b>0.50</b>                     | 0.00334 |

<sup>a</sup> GenBank IDs selected by Compugen for probe design.

<sup>b</sup> Comparison of 5dpi zebrafish infected with wild-type Mm versus mock infected.

Table S4: qRT-PCR primers used in this study

| Gene                 | Forward Primer 5' to 3'   | Reverse Primer 5' to 3'   | Probe (if applicable) |
|----------------------|---------------------------|---------------------------|-----------------------|
| <i>b-actin</i>       | CTGAATCCCAAGCCAACAGAGA    | GCCTGGATGGCCACATACAT      | CATGATCTGTGTCATCTTC   |
| <i>b-actin</i>       | ACCTGACAGACTACCTGATG      | TGAAGGTGGTCTCATGGATAC     |                       |
| <i>c4</i>            | GGAGGTGAAGCCTGTATTGC      | TGACACACGTCATCTGAGCA      |                       |
| <i>c9</i>            | CGACCGATGAGTCAGATGAA      | GCTGCTCTCTCCACCTTTG       |                       |
| <i>cfb</i>           | TTTGCCAACCTAATGGGAAG      | CACTGTGGCTCTGTTCCCTGA     |                       |
| <i>il-12ba (p40)</i> | AACATCTGAGAGCTTCTGGAACTC  | GGCACTTCTACCCTATTTACACCTT | CACCACAAGACAATTTG     |
| <i>il-1beta</i>      | TGGACTTCGCAGCACAAAATG     | GTTCACTTCACGCTCTTGGATG    |                       |
| <i>itga5</i>         | CGAGTCGCATCAGTCACACT      | CCCACTGGAGCAAGACAGA       |                       |
| <i>lqals9l1</i>      | AACCCACGCTATGAGGACAC      | GGATTCTGGAAGGCAACAGA      |                       |
| <i>mmp2</i>          | CCTTCCACAAGACCAAGAAGAC    | AGTGCACCATCTAGGTCATCG     |                       |
| <i>mmp13</i>         | CTGGAATGACCGGGAAGGT       | TGGAGCCAAACTCAAGCATCTTT   | CCAGTACAGAGGTTTAAAC   |
| <i>mmp9</i>          | CATCACTGAAATCCAGAAGGAGCTT | GTTCAACATTGCCTGAGATCTTC   | AAGGACGGGCGCTACT      |
| <i>mpx/mpo</i>       | TTGCCTTACATCCCACATA       | TGTTCACTACCACAGCCAAT      |                       |
| <i>socs3a</i>        | CTGAGACTGGTCCAGCACTACATG  | TTTTCTCCCCTCCTGTGTAGATG   |                       |
| <i>timp2b</i>        | GAGCAATGGCAAGCAGGAATAC    | GCGCAGTGTGCCATTTGAATT     | CTGATCACAGGTAATTTG    |
| <i>tnf</i>           | TTCCAAGGCTGCCATCCATTA     | GGTCATCTCTCCAGTCTAAGGTCTT | ACAGGTGGATACAACCTCT   |
